# Supplementary material
Source: PubMed Central journal article supplement (PMC3533394)
Supplement: supp_125.21.5188_JCS109884.pdf [file supp_125.21.5188_JCS109884.pdf]

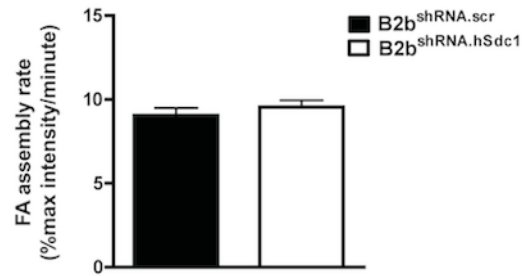

**Fig. S1. Syndecan-1 does not affect FA assembly in migrating lung epithelial cells.** Migrating B2b<sup>shRNA.scr</sup> and B2b<sup>shRNA.hSdc1</sup> cells stably expressing paxillin-eGFP were observed by time-lapse TIRF microscopy, and the rate of the FA assembly was determined. The FA assembly rate was similar between B2b<sup>shRNA.scr</sup> cells (9.04±0.45 %max intensity/min) and B2b<sup>shRNA.hSdc1</sup> cells (9.55±0.39 %max intensity/min).

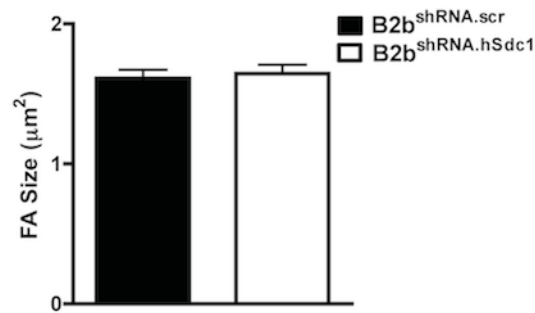

**Fig. S2. Syndecan-1 does not affect FA size in migrating lung epithelial cells.** Migrating B2b<sup>shRNA.scr</sup> and B2b<sup>shRNA.hSdc1</sup> cells stably expressing paxillin-eGFP were observed by time-lapse TIRF microscopy. Leading edge FAs were identified and the size measured at the peak FA intensity (and size). The FA size was similar between B2b<sup>shRNA.scr</sup> cells (1.61±0.06 μm<sup>2</sup>) and B2b<sup>shRNA.hSdc1</sup> cells (1.64±0.07 μm<sup>2</sup>).

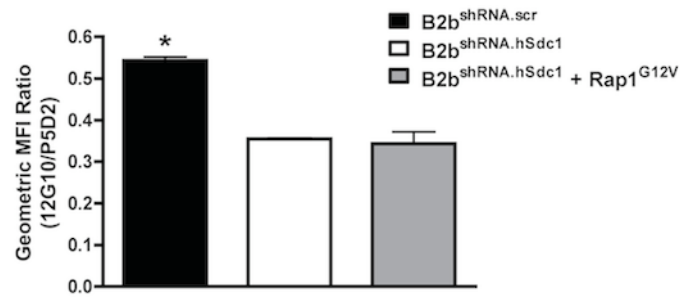

**Fig. S3. Rap1 expression does not augment activation of the  $\beta_1$  integrin subunit in B2b<sup>shRNA.hSdc1</sup> cells.** B2b<sup>shRNA.scr</sup> and B2b<sup>shRNA.hSdc1</sup> cells were infected with AAV-eGFP (control) or AAV-Rap1<sup>G12V</sup>-IRES-eGFP to transduce activated Rap1. Cells were immunostained for the high affinity  $\beta_1$  integrin subunit (clone 12G10) and all  $\beta_1$  integrin subunit (clone P5D2). The  $\beta_1$  subunit antibodies (clones 12G10 and P5D2) were conjugated with Pacific Blue and Alexa-647, respectively (Zenon labeling kit; Invitrogen) prior to immunostaining cells. Flow cytometry was performed on a BD FACS Canto II. After gating for eGFP-positive cells, the geometric mean fluorescent intensity (MFI) was determined for the high affinity and total  $\beta_1$  integrin subunit (FlowJo), and the ratio of high affinity (12G10) to total (P5D2)  $\beta_1$  integrin subunit is presented in the bar graph. \* $P < 0.0005$  by one-way ANOVA;  $n = 3$ .

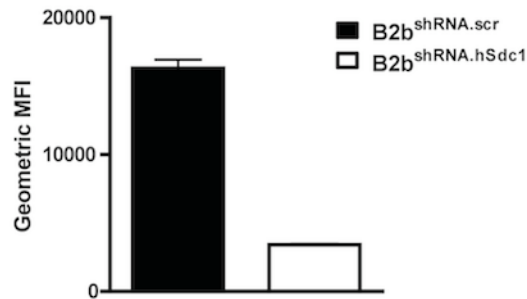

**Fig. S4. Syndecan-1 expression levels on control (B2b<sup>shRNA.scr</sup>) and knockdown (B2b<sup>shRNA.hSdc1</sup>) cells.** Syndecan-1 levels were quantified on B2b<sup>shRNA.scr</sup> and B2b<sup>shRNA.hSdc1</sup> cells by flow cytometry using anti-syndecan-1 antibody (clone BA38). The geometric mean fluorescent intensity (MFI) was determined for B2b<sup>shRNA.scr</sup> cells (16,310±637 MFI) and B2b<sup>shRNA.hSdc1</sup> cells (3,407±61 MFI).
